# Supplementary material for: Burden and Determinants of Smoking among Prisoners with Respiratory Tract Infection: A Cross-Sectional Study of Nine Major Prison Setups in Northern Ethiopia
Source: PubMed Central journal article supplement (PMC5193439; doi:10.1371/journal.pone.0168941), 2016-12-28
Supplement: pone.0168941.s001.pdf [file pone.0168941.s001.pdf]

Date -----

English version of smoking questionnaire

Questionnaire code number \_\_\_\_\_

Prison name -----

Interviewer's Name \_\_\_\_\_

Mobile No-----

| <b>Part I. Socio-demographic characteristics</b> |                                                                            |                                                                                                                                                                                           |
|--------------------------------------------------|----------------------------------------------------------------------------|-------------------------------------------------------------------------------------------------------------------------------------------------------------------------------------------|
| No                                               | Questions                                                                  | Coding category/response                                                                                                                                                                  |
| 1.                                               | Age in years                                                               | -----years                                                                                                                                                                                |
| 2.                                               | Sex                                                                        | 1. Female<br>2. Male                                                                                                                                                                      |
| 3.                                               | Marital status                                                             | 1. Single<br>2. Married<br>3. Divorced<br>4. Widowed<br>5. Separated                                                                                                                      |
| 4.                                               | Education                                                                  | 1. Not able to read and write<br>2. Able to read and write without formal school year<br>3. Primary (1-8)<br>4. Secondary (9-10 or 12)<br>5. College (10+ or 12+)<br>6. University degree |
| 5.                                               | Occupation before imprisonment                                             | 1. Civil servant(gov't)<br>2. Farmers<br>3. Merchant<br>4. Daily wages<br>5. Student<br>6. House wife<br>7. Unemployed<br>8. Others (specify _____)                                       |
| 6.                                               | Residence place (before detained)                                          | 1. Rural<br>2. Urban                                                                                                                                                                      |
| 7.                                               | Have you ever smoked in the past 12 months?                                | 1. Yes<br>2. No (If "No", skip to question 10 )                                                                                                                                           |
| 8.                                               | If your answer is "Yes" to question 7, how many packs/day?                 | _____ packs/day, _____cigarettes/day                                                                                                                                                      |
| 9.                                               | How long have you smoked?                                                  | _____(write the time unit in weeks or months or years)                                                                                                                                    |
| 10.                                              | Do you chew 'khat'?                                                        | 1. Yes<br>2. No (If "No", skip to question 12 )                                                                                                                                           |
| 11.                                              | If your answer is "Yes" to question 10, for how long have you chewed khat? | _____(write the time unit in weeks or months or years)                                                                                                                                    |

Date -----

English version of smoking questionnaire

Questionnaire code number \_\_\_\_\_

Prison name -----

Interviewer's Name \_\_\_\_\_

Mobile No-----

|                                                                |                                                                                     |                                                                                        |
|----------------------------------------------------------------|-------------------------------------------------------------------------------------|----------------------------------------------------------------------------------------|
| 12.                                                            | Were you drinking alcohol including "Tela" and "Areki" (before your detention)?     | 1. Yes<br>2. No                                                                        |
| 13.                                                            | If your answer is "Yes" to question number 12, how frequent is it?                  | _____ bottles per week for alcohol like beer<br>_____ cups per week for areki or wiski |
| <b>Part II. Prison and health related aspects of prisoners</b> |                                                                                     |                                                                                        |
| 14.                                                            | Total number of prisoners in the prison site                                        | _____ prisoners                                                                        |
| 15.                                                            | Total number of rooms in the prison site                                            | _____ rooms                                                                            |
| 16.                                                            | Total length of stay since detention                                                | _____ months/years (Write the unit of time)                                            |
| 17.                                                            | Type of prisoner                                                                    | 1. On court process<br>2. Sentenced                                                    |
| 18.                                                            | How long have you been imprisoned in this prison site?                              | _____ (Write the time unit: months/ years)                                             |
| 19.                                                            | Have you ever been imprisoned previously?                                           | 1. Yes<br>2. No                                                                        |
| 20.                                                            | If your answer is "Yes" to question 19, how many times?                             | _____ times                                                                            |
| 21.                                                            | Do you have support from your family in terms of visit and bringing food?           | 1. I don't have<br>2. Visit only<br>3. Food only<br>4. Both visit and food             |
| 22.                                                            | If you have family visit, how many times per week (month) do they bring you food?   | _____ times (per week or month or year)                                                |
| 23.                                                            | Do the prison health staff educate you about TB and other health related education? | 1. Yes<br>2. No                                                                        |
| 24.                                                            | Do you have a cough?                                                                | 1. Yes<br>2. No                                                                        |
| 25.                                                            | For how long have you been coughing?                                                | ----- weeks/months/years                                                               |

Date -----

English version of smoking questionnaire

Questionnaire code number \_\_\_\_\_

Prison name -----

Interviewer's Name \_\_\_\_\_

Mobile No-----

|     |                                                                                                    |                                                                                                                                                                                                                                                              |
|-----|----------------------------------------------------------------------------------------------------|--------------------------------------------------------------------------------------------------------------------------------------------------------------------------------------------------------------------------------------------------------------|
| 26. | Currently, what kind of symptoms do you have on top of coughing?                                   | <ol style="list-style-type: none"> <li>1. difficulty of breathing</li> <li>2. fever</li> <li>3. weight loss</li> <li>4. night sweating</li> <li>5. loss of appetite</li> <li>6. fatigue</li> <li>7. bloody sputum</li> <li>8. others (specify)___</li> </ol> |
| 27. | Time of occurrence of the cough                                                                    | <ol style="list-style-type: none"> <li>1. Before imprisonment</li> <li>2. After imprisonment</li> </ol>                                                                                                                                                      |
| 28. | Did you visit and receive any treatment for your current complaint                                 | <ol style="list-style-type: none"> <li>1. Yes</li> <li>2. No</li> </ol>                                                                                                                                                                                      |
| 29. | If your answer is "Yes" to question 28, where?                                                     | <ol style="list-style-type: none"> <li>1. health institution outside of the prison</li> <li>2. prison's clinic</li> <li>3. both</li> <li>4. Others (specify)-----</li> </ol>                                                                                 |
| 30. | Do you have a diagnosed health problem like Diabetic mellitus, skin infections Hypertension...etc? | <ol style="list-style-type: none"> <li>1. Yes</li> <li>2. No</li> </ol>                                                                                                                                                                                      |
| 31. | Have you ever been hospitalized due to any health problem?                                         | <ol style="list-style-type: none"> <li>1. Yes</li> <li>2. No</li> </ol>                                                                                                                                                                                      |
| 32. | If your answer is "Yes" to question 31, how long?                                                  | -----months                                                                                                                                                                                                                                                  |
| 33. | If yes to question 31, what was the reason for your hospitalization?                               | .....<br>.....                                                                                                                                                                                                                                               |
| 34. | Have you ever had sexual intercourse out of your girl friend/boy friend or wife/ husband?          | <ol style="list-style-type: none"> <li>1. Yes</li> <li>2. No</li> </ol>                                                                                                                                                                                      |
| 35. | If your answer is "Yes" to question number 34, have you been using condom consistently?            | <ol style="list-style-type: none"> <li>1. Yes</li> <li>2. No</li> </ol>                                                                                                                                                                                      |
| 36. | Have you been tested for HIV?                                                                      | <ol style="list-style-type: none"> <li>1. Yes</li> <li>2. No</li> </ol>                                                                                                                                                                                      |

Date -----

English version of smoking questionnaire

Questionnaire code number \_\_\_\_\_

Prison name -----

Interviewer's Name \_\_\_\_\_

Mobile No-----

|     |                                                              |                            |
|-----|--------------------------------------------------------------|----------------------------|
| 37. | If your answer is "Yes" to question 36, what was the result? | 1. Yes<br>2. No            |
| 38. | Current HIV serostatus (after HIV test)                      | 1. Negative<br>2. Positive |

**Thank You So Much For Your Time and Contribution!!**
